# Supplementary material for: Childhood Obesity and Plasma Micronutrient Deficit of Chilean Children between 4 and 14 Years Old
Source: MDPI journal article supplement (doi:10.3390/nu15071707), 2023-03-31
Supplement: s1 [file s1]

## School Survey

Name \_\_\_\_\_

Date \_\_\_\_/\_\_\_\_/\_\_\_\_

Sex/Gender \_\_\_\_\_

Grade \_\_\_\_ - \_\_\_\_ School: \_\_\_\_\_

Please, answer the following questions:

1. How many days a week do you consume milk, yogurt or cheese?

☐ None    ☐ 1    ☐ 2    ☐ 3    ☐ 4    ☐ 5    ☐ 6    ☐ 7

2. How much dairy, such as milk, cheese, yogurt, do you eat per day?

|                                                                                   |                                                                                   |                                                                                   |                                                                                    |                |                            |
|-----------------------------------------------------------------------------------|-----------------------------------------------------------------------------------|-----------------------------------------------------------------------------------|------------------------------------------------------------------------------------|----------------|----------------------------|
|  |  |  |  |                | I don't eat dairy products |
| 1 portion                                                                         | 2 portions                                                                        | 3 portions                                                                        | 4 portions                                                                         | n° de portions |                            |

3. How many days a week do you eat fruit like apple, banana, pear, orange...?

☐ None    ☐ 1    ☐ 2    ☐ 3    ☐ 4    ☐ 5    ☐ 6    ☐ 7

4. How many fruits do you eat a day?

|                                                                                     |                                                                                     |                                                                                     |                                                                                      |              |                    |
|-------------------------------------------------------------------------------------|-------------------------------------------------------------------------------------|-------------------------------------------------------------------------------------|--------------------------------------------------------------------------------------|--------------|--------------------|
|  |  |  |  |              | I don't eat fruits |
| 1 fruit                                                                             | 2 fruits                                                                            | 3 fruits                                                                            | 4 fruits                                                                             | n° de fruits |                    |

5. How many days a week do you eat vegetables or salads?

☐ None    ☐ 1    ☐ 2    ☐ 3    ☐ 4    ☐ 5    ☐ 6    ☐ 7

6. How many vegetable dishes or salads do you eat a day?

|                                                                                     |                                                                                     |                                                                                     |                                                                                      |              |                                  |
|-------------------------------------------------------------------------------------|-------------------------------------------------------------------------------------|-------------------------------------------------------------------------------------|--------------------------------------------------------------------------------------|--------------|----------------------------------|
|  |  |  |  |              | I don't eat salads or vegetables |
| 1 plate                                                                             | 2 plates                                                                            | 3 plates                                                                            | 4 plates                                                                             | n° of plates |                                  |

7. How many glasses a day do you drink of juices and/or soft drinks, normal or with sugar (not light or zero)?

|                                                                                     |                                                                                     |                                                                                     |                                                                                     |            |                                       |
|-------------------------------------------------------------------------------------|-------------------------------------------------------------------------------------|-------------------------------------------------------------------------------------|-------------------------------------------------------------------------------------|------------|---------------------------------------|
|  |  |  |  |            | I don't drink juices and fizzy drinks |
| 1 glass                                                                             | 2 glasses                                                                           | 3 glasses                                                                           | 4 glasses                                                                           | n° glasses |                                       |

8. How many glasses of water do you drink a day?

|                                                                                   |                                                                                   |                                                                                   |                                                                                    |            |                     |
|-----------------------------------------------------------------------------------|-----------------------------------------------------------------------------------|-----------------------------------------------------------------------------------|------------------------------------------------------------------------------------|------------|---------------------|
|  |  |  |  |            | I don't drink water |
| 1 glass                                                                           | 2 glasses                                                                         | 3 glasses                                                                         | 4 glasses                                                                          | n° glasses |                     |

9. How many times a week do you eat legumes such as lentils, beans or chickpeas?

|                                                                                   |                                                                                   |                                                                                   |                                                                                   |                   |                     |
|-----------------------------------------------------------------------------------|-----------------------------------------------------------------------------------|-----------------------------------------------------------------------------------|-----------------------------------------------------------------------------------|-------------------|---------------------|
|  |  |  |  |                   | I don't eat legumes |
| 1 time per week                                                                   | 2 times per week                                                                  | 3 times per week                                                                  | 4 times per week                                                                  | n° times per week |                     |

10. How many times a week do you eat fish?

|                                                                                   |                                                                                   |                                                                                   |                                                                                    |                   |                   |
|-----------------------------------------------------------------------------------|-----------------------------------------------------------------------------------|-----------------------------------------------------------------------------------|------------------------------------------------------------------------------------|-------------------|-------------------|
|  |  |  |  |                   | I do not eat fish |
| 1 time per week                                                                   | 2 times per week                                                                  | 3 times per week                                                                  | 4 times per week                                                                   | n° times per week |                   |

11. How many times a week do you eat cookies or candies?

|                                                                                    |                                                                                    |                                                                                    |                                                                                    |                  |                                |
|------------------------------------------------------------------------------------|------------------------------------------------------------------------------------|------------------------------------------------------------------------------------|------------------------------------------------------------------------------------|------------------|--------------------------------|
|  |  |  |  |                  | I don't eat cookies or candies |
| 1 day a week                                                                       | 2 days a week                                                                      | 3 days a week                                                                      | 4 days a week                                                                      | n° days per week |                                |

12. How many times a week do you eat French fries, pizzas or burgers?

|                                                                                     |                                                                                     |                                                                                     |                                                                                      |                  |                                    |
|-------------------------------------------------------------------------------------|-------------------------------------------------------------------------------------|-------------------------------------------------------------------------------------|--------------------------------------------------------------------------------------|------------------|------------------------------------|
| 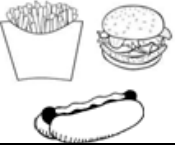 |  |  |  |                  | I don't eat fries, pizzas, burgers |
| 1 day a week                                                                        | 2 days a week                                                                       | 3 days a week                                                                       | 4 days a week                                                                        | n° days per week |                                    |

13. How many times a week do you eat salty products such as chips or nachos?

|                                                                                     |                                                                                     |                                                                                     |                                                                                      |                  |                          |
|-------------------------------------------------------------------------------------|-------------------------------------------------------------------------------------|-------------------------------------------------------------------------------------|--------------------------------------------------------------------------------------|------------------|--------------------------|
| 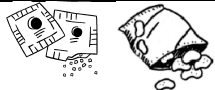 |  |  |  |                  | I don't eat salty snacks |
| 1 day a week                                                                        | 2 days a week                                                                       | 3 days a week                                                                       | 4 days a week                                                                        | n° days per week |                          |

- |                                                                            |                              |                             |
|----------------------------------------------------------------------------|------------------------------|-----------------------------|
| 1. Do you eat a snack at school?                                           | <input type="checkbox"/> YES | <input type="checkbox"/> NO |
| 2. Do you bring a snack from home?                                         | <input type="checkbox"/> YES | <input type="checkbox"/> NO |
| 3. Do you buy snacks at school or outside of school?                       | <input type="checkbox"/> YES | <input type="checkbox"/> NO |
| 4. Do they give you special snacks at school (cookie, cereal, cake, etc.)? | <input type="checkbox"/> YES | <input type="checkbox"/> NO |

5. What do you bring from home for lunch? (Ask if he answered yes to question 15)

- ☐ Fruits
- ☐ Vegetables
- ☐ Salty snacks, chips, soufflés, etc.
- ☐ Milk or yogurt
- ☐ Sweet snacks, cookies, chocolates, etc.
- ☐ French fries, empanadas, etc
- ☐ Bread, crackers, etc
- ☐ Sugary drinks or juices
- ☐ Sugar-free drinks or juices
- ☐ Hard-boiled egg
- ☐ Water

6. Do you bring money to buy food at school?

- ☐ 1 day a week
- ☐ 2 days a week
- ☐ 3 days a week
- ☐ 4 days a week
- ☐ 5 days a week

7. How much money do you bring to school? \$ \_\_\_\_\_

8. What do you buy with the money?

- ☐ Fruits
- ☐ Vegetables
- ☐ Salty snacks, chips, soufflés, etc.
- ☐ Milk or yogurt
- ☐ Sweet snacks, cookies, chocolates, etc.
- ☐ French fries, empanadas, etc
- ☐ Bread, crackers, etc
- ☐ Sugary drinks or juices
- ☐ Sugar-free drinks or juices
- ☐ Hard-boiled egg
- ☐ Water

9. What do you usually do at recess?

- ☐ You play ball, run, jump rope or similar
- ☐ You sit down (to talk, read, play mobile games or similar)
- ☐ You sit down to eat

10. What do you usually do after school?

- ☐ Workshop or sports activity such as soccer, basketball, karate, athletics, zumba, others
- ☐ Play in the square or street
- ☐ Watch TV or play video games
- ☐ Riding a bike, rollerblading

11. Outside of school, how many hours a day do you watch television or play on the computer/console/cell phone?

- ☐ Less than 1 hour
- ☐ 1 to 2 hours
- ☐ 2 to 3 hours
- ☐ More than 3 hours
